# Supplementary material
Source: PubMed Central journal article supplement (PMC3837515)
Supplement: supp_blood-2013-08-519157_FigureS1.pdf [file supp_blood-2013-08-519157_FigureS1.pdf]

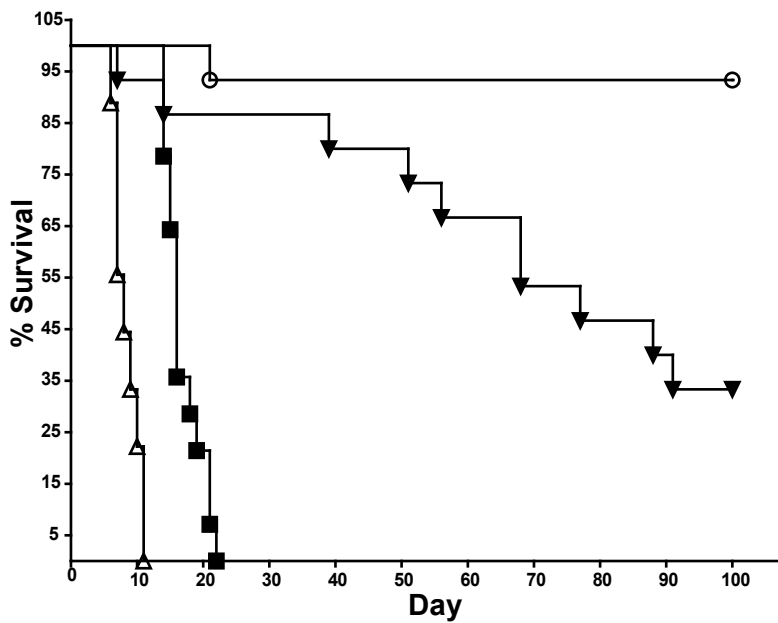

| Host                                                | Irrad | TCD-BM | Tcon | Symbol |
|-----------------------------------------------------|-------|--------|------|--------|
| C57BL/6 WT                                          | +     |        |      | ■      |
| C57BL/6 WT                                          | +     | +      |      | ○      |
| C57BL/6 WT                                          | +     | +      | +    | ▼      |
| C57- <i>Cpa3-Cre</i> ; <i>Mcl-1<sup>fl/fl</sup></i> | +     | +      | +    | △      |

**Supplemental Figure 1: Mast cell-deficient C57BL/6-*Cpa3-Cre*;*Mcl-1<sup>fl/fl</sup>* mice have exacerbated GVHD.** Recipient mice, which were either C57BL/6 (H-2<sup>b</sup>) wild-type or mast cell-deficient C57BL/6-*Cpa3-Cre*; *Mcl-1<sup>fl/fl</sup>* mice, were lethally irradiated and transplanted with  $5.0 \times 10^6$  TCD-BM, followed by  $2.0 \times 10^6$  Tcon on day 4 (to induce GVHD) from FVB/N donors (H-2<sup>q</sup>). Data were pooled from 2 independent experiments performed, each of which gave similar results (n=9 for C57BL/6-*Cpa3-Cre*; *Mcl-1<sup>fl/fl</sup>* recipients, n=15 for all other groups). Significantly better survival was observed in the control mice containing mast cells than in the mast cell-deficient C57BL/6-*Cpa3-Cre*;*Mcl-1<sup>fl/fl</sup>* mice (p<0.0001).
